# Supplementary material for: Supported gold nanoparticles as a reusable catalyst for synthesis of lactones from diols using molecular oxygen as an oxidant under mild conditions
Source: Royal Society of Chemistry journal article supplement (doi:10.1039/b900576e), 2009-01-01
Supplement: b900576e.pdf [file b900576e.pdf]

## Supplementary Information

### Supported Gold Nanoparticles as a Reusable Catalyst for Synthesis of Lactones from Diols Using Molecular Oxygen as an Oxidant under Mild Conditions

Takato Mitsudome,<sup>a</sup> Akifumi Noujima,<sup>a</sup> Tomoo Mizugaki,<sup>a</sup> Koichiro Jitsukawa,<sup>a</sup> and Kiyotomi Kaneda\*<sup>a, b</sup>

<sup>a</sup> *Department of Materials Engineering Science, Graduate School of Engineering Science, Osaka University, 1-3 Machikaneyama, Toyonaka, Osaka, 560-8531, Japan.*  
*E-mail: kaneda@cheng.es.osaka-u.ac.jp;*

*Fax: +81 6-6850-6260; Tel: +81 6-6850-6260*

<sup>b</sup> *Research Center for Solar Energy Chemistry, Osaka University, 1-3 Machikaneyama, Toyonaka, Osaka, 560-8531, Japan*

### Contents

|                               |           |
|-------------------------------|-----------|
| <b>EXAFS spectra of Au/HT</b> | <b>2S</b> |
| <b>TEM image of Au/HT</b>     | <b>3S</b> |

EXAFS

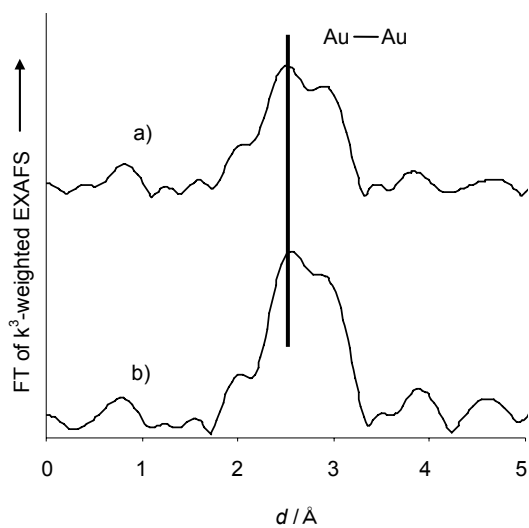

**Figure 1S.** Fourier transformation of  $k^3$ -weighted Au L-edge EXAFS experimental data for a) Au foil and b) Au/HT.

TEM

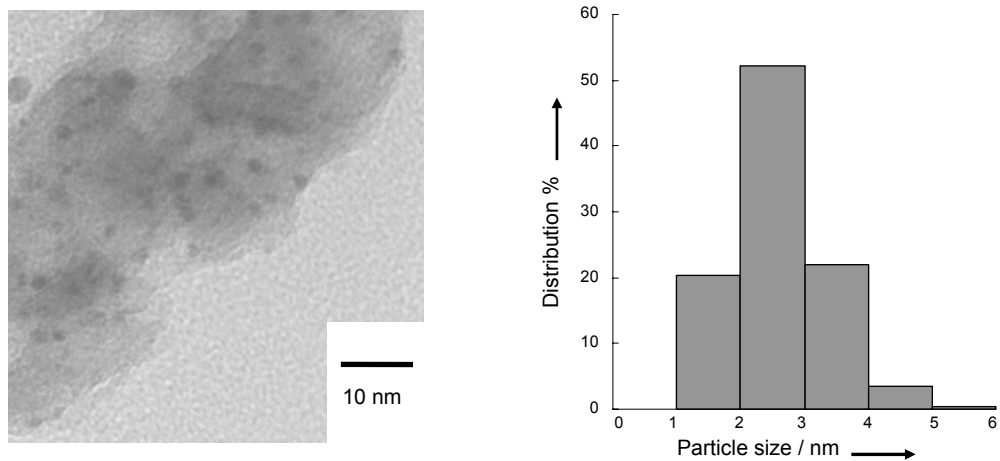

**Figure 2S.** a) TEM image of Au/HT, and b) size distribution diagram of the Au nanoparticles
